# Supplementary material for: Humic acids-modified mesoporous silica encapsulating magnetite: crystal and surface characteristics
Source: Royal Society of Chemistry journal article supplement (doi:10.1039/d4ce00281d), 2024-01-01
Supplement: d4ce00281d1.pdf [file d4ce00281d1.pdf]

Supplementary Materials

Humic acids-modified mesoporous silica encapsulating magnetite: crystal and surface characteristics

Artur Dzeranov, Denis Pankratov, Lyubov Bondarenko, Lyudmila Telegina, Gulzhian Dzhardimalieva, Daniel Saman, and Kamila Kydralieva

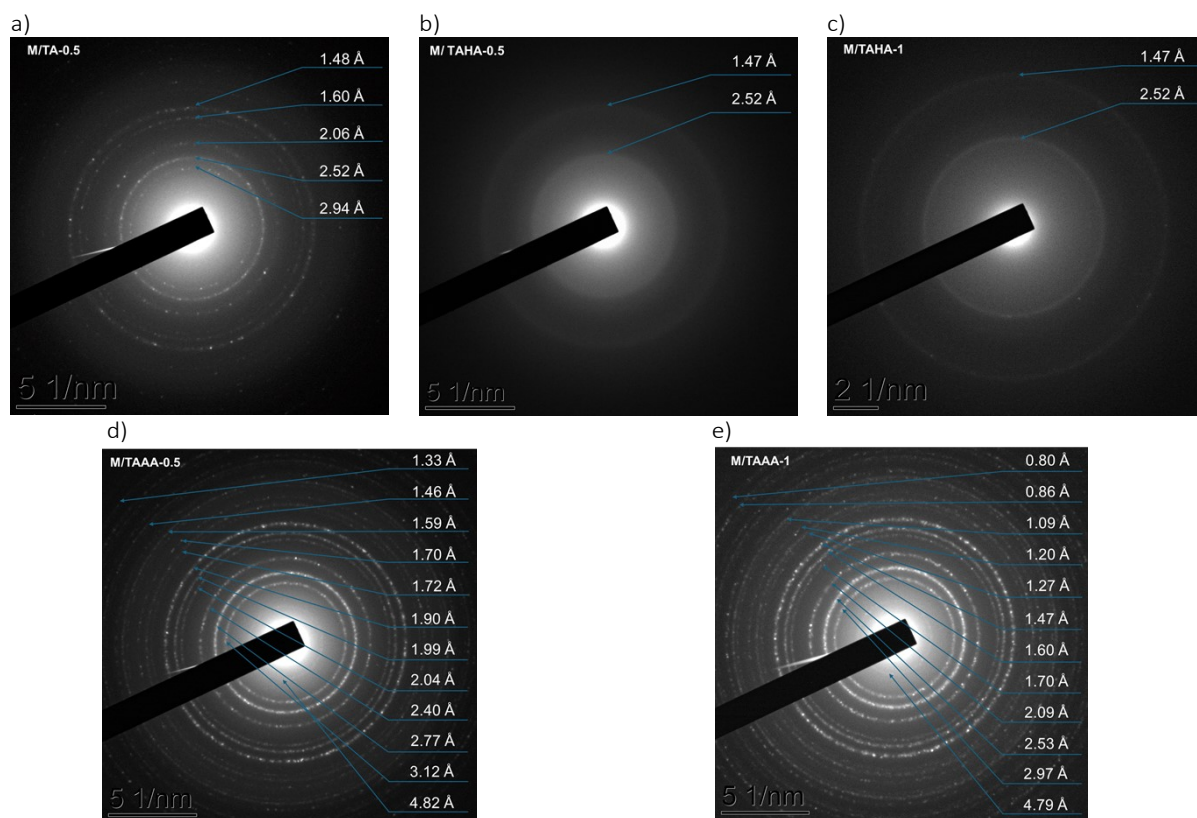

**Fig. S1.** Electron diffraction patterns of M/TA-0.5 (a), M/TAHA-0.5 (b), M/TAHA-1 (c), M/TAAA-0.5 (d) and M/TAAA-1 (e)

**Table S1.** Results of analysis of the phase composition of samples.

| Sample     | Interplanar spacing $d$ , Å | $h$ | $k$ | $l$ | Composition                                                        |
|------------|-----------------------------|-----|-----|-----|--------------------------------------------------------------------|
| M/TA-0.5   | 2.94 Å                      | 2   | 2   | 0   | $\gamma$ -Fe <sub>2</sub> O <sub>3</sub> [amcsd 0020517]           |
|            | 2.52 Å                      | 3   | 1   | 1   | Fe <sub>3</sub> O <sub>4</sub> [amcsd 0002400]                     |
|            | 2.06 Å                      | 5   | 0   | 1   | $\beta$ -FeOOH [amcsd 000307]                                      |
|            | 1.60 Å                      | 2   | 3   | 1   | $\alpha$ -FeOOH [amcsd 0010471]                                    |
|            | 1.48 Å                      | 4   | 4   | 0   | Fe <sub>3</sub> O <sub>4</sub> [amcsd 0002400]                     |
| M/TAHA-0.5 | 2.52 Å                      | 3   | 1   | 1   | Fe <sub>3</sub> O <sub>4</sub> [amcsd 0002400]                     |
|            | 1.47 Å                      | 1   | 1   | 0   | 5Fe <sub>2</sub> O <sub>3</sub> ·9H <sub>2</sub> O [amcsd 0012029] |
| M/TAHA-1   | 2.52 Å                      | 3   | 1   | 1   | Fe <sub>3</sub> O <sub>4</sub> [amcsd 0002400]                     |
|            | 1.47 Å                      | 1   | 1   | 0   | 5Fe <sub>2</sub> O <sub>3</sub> ·9H <sub>2</sub> O [amcsd 0012029] |
| M/TAAA-0.5 | 4.82 Å                      | 1   | 1   | 1   | $\gamma$ -Fe <sub>2</sub> O <sub>3</sub> [amcsd 0020517]           |
|            | 3.12 Å                      |     |     |     | Not identified                                                     |
|            | 2.77 Å                      | 2   | 2   | 1   | $\gamma$ -Fe <sub>2</sub> O <sub>3</sub> [amcsd 0020517]           |
|            | 2.40 Å                      | 2   | 2   | 2   | $\gamma$ -Fe <sub>2</sub> O <sub>3</sub> [amcsd 0020517]           |
|            | 2.04 Å                      | 1   | 0   | 5   | $\beta$ -FeOOH [amcsd 000307]                                      |
|            | 1.99 Å                      | 1   | 3   | 1   | $\alpha$ -FeOOH [amcsd 0010471]                                    |

|       |        |    |   |   |                                                                    |
|-------|--------|----|---|---|--------------------------------------------------------------------|
|       | 1.90 Å | 0  | 4 | 1 | $\alpha$ -FeOOH [amcsd 0010471]                                    |
|       | 1.72 Å | 1  | 0 | 4 | 5Fe <sub>2</sub> O <sub>3</sub> ·9H <sub>2</sub> O [amcsd 0012029] |
|       | 1.70 Å | 4  | 2 | 2 | $\gamma$ -Fe <sub>2</sub> O <sub>3</sub> [amcsd 0020517]           |
|       | 1.59 Å | 0  | 1 | 8 | $\alpha$ -Fe <sub>2</sub> O <sub>3</sub> [amcsd 0021166]           |
|       | 1.46 Å | -4 | 0 | 6 | $\beta$ -FeOOH [amcsd 000307]                                      |
|       | 1.33 Å | 6  | 2 | 0 | Fe <sub>3</sub> O <sub>4</sub> [amcsd 0002400]                     |
| <hr/> |        |    |   |   |                                                                    |
|       | 4.79 Å | 1  | 1 | 1 | $\gamma$ -Fe <sub>2</sub> O <sub>3</sub> [amcsd 0020517]           |
|       | 2.97 Å | 2  | 2 | 0 | Fe <sub>3</sub> O <sub>4</sub> [amcsd 0002400]                     |
|       | 2.53 Å | 3  | 1 | 1 | Fe <sub>3</sub> O <sub>4</sub> [amcsd 0002400]                     |
|       | 2.09 Å | 4  | 0 | 0 | Fe <sub>3</sub> O <sub>4</sub> [amcsd 0002400]                     |
|       | 1.70 Å | 4  | 2 | 2 | $\gamma$ -Fe <sub>2</sub> O <sub>3</sub> [amcsd 0020517]           |
|       | 1.60 Å | 5  | 1 | 1 | $\gamma$ -Fe <sub>2</sub> O <sub>3</sub> [amcsd 0020517]           |
|       | 1.47 Å | 1  | 1 | 0 | 5Fe <sub>2</sub> O <sub>3</sub> ·9H <sub>2</sub> O [amcsd 0012029] |
|       | 1.27 Å | 5  | 3 | 3 | $\gamma$ -Fe <sub>2</sub> O <sub>3</sub> [amcsd 0020517]           |
|       | 1.20 Å | 4  | 4 | 4 | $\gamma$ -Fe <sub>2</sub> O <sub>3</sub> [amcsd 0020517]           |
|       | 1.09 Å | 2  | 2 | 6 | Fe <sub>3</sub> O <sub>4</sub> [amcsd 0002400]                     |
|       | 0.86 Å |    |   |   | Not identified                                                     |
|       | 0.80 Å |    |   |   | Not identified                                                     |

M/TAAA-1

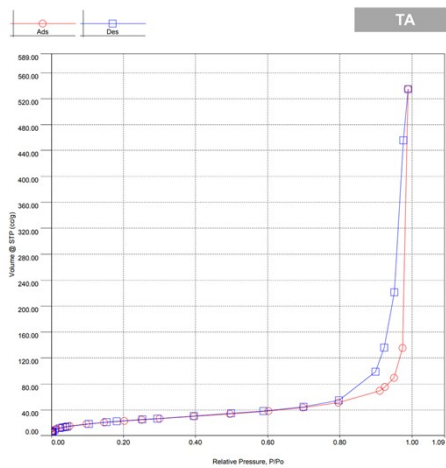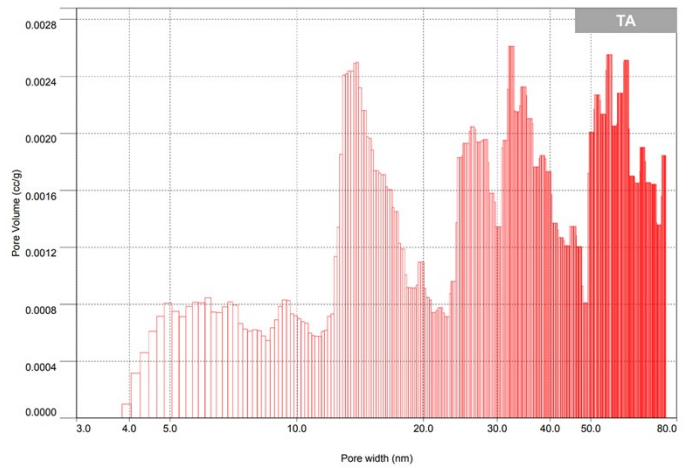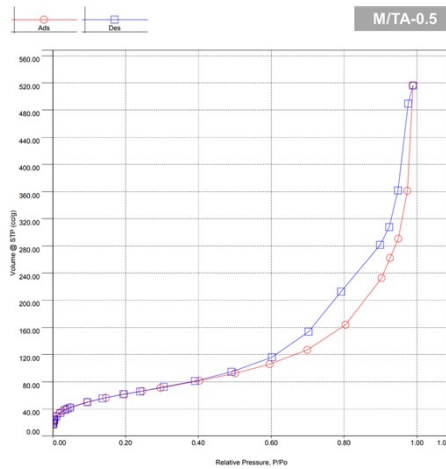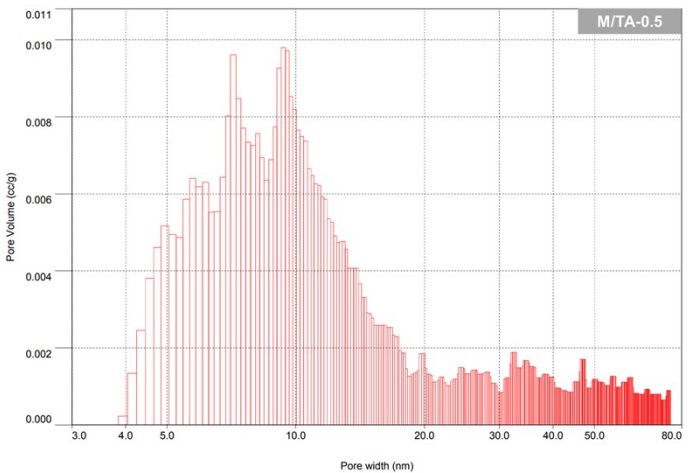

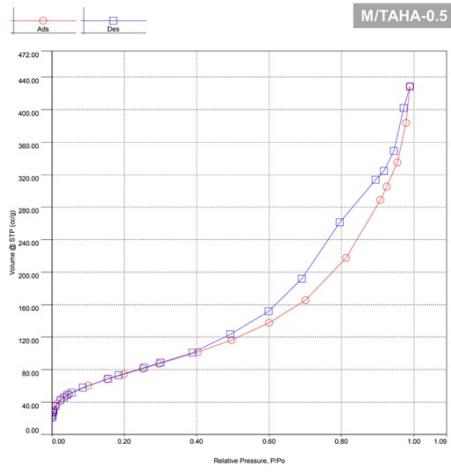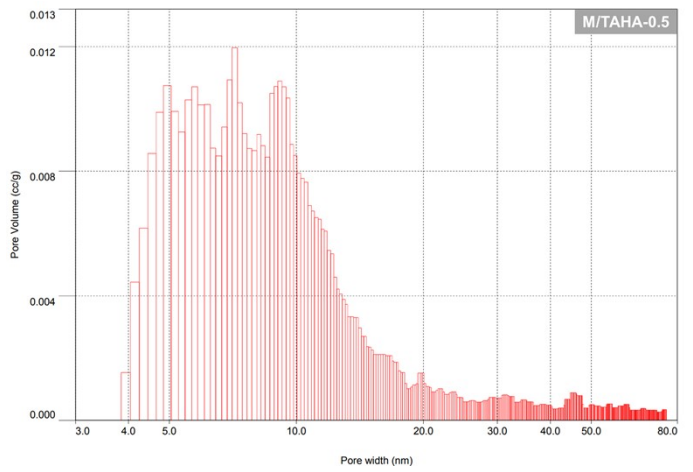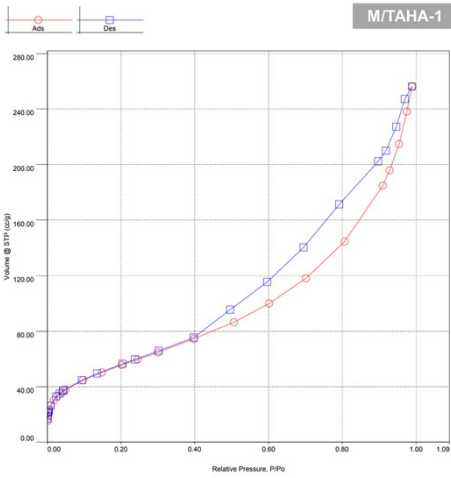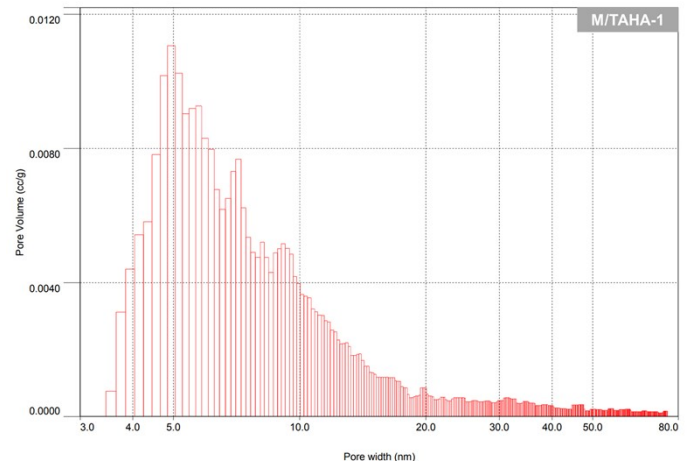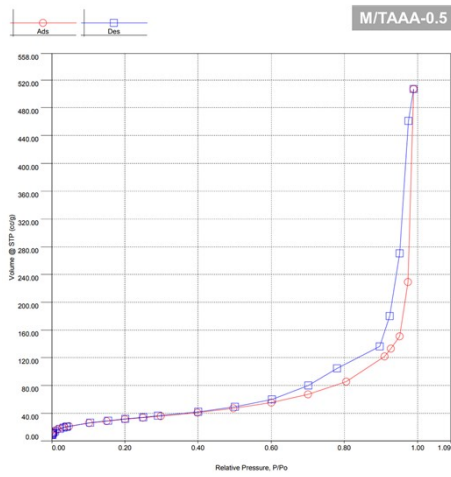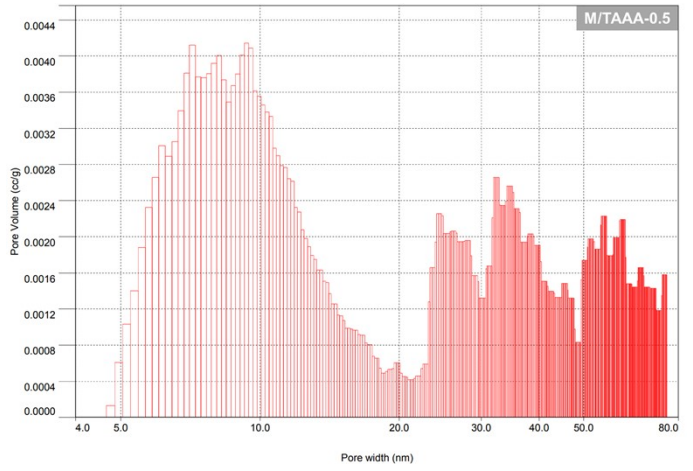

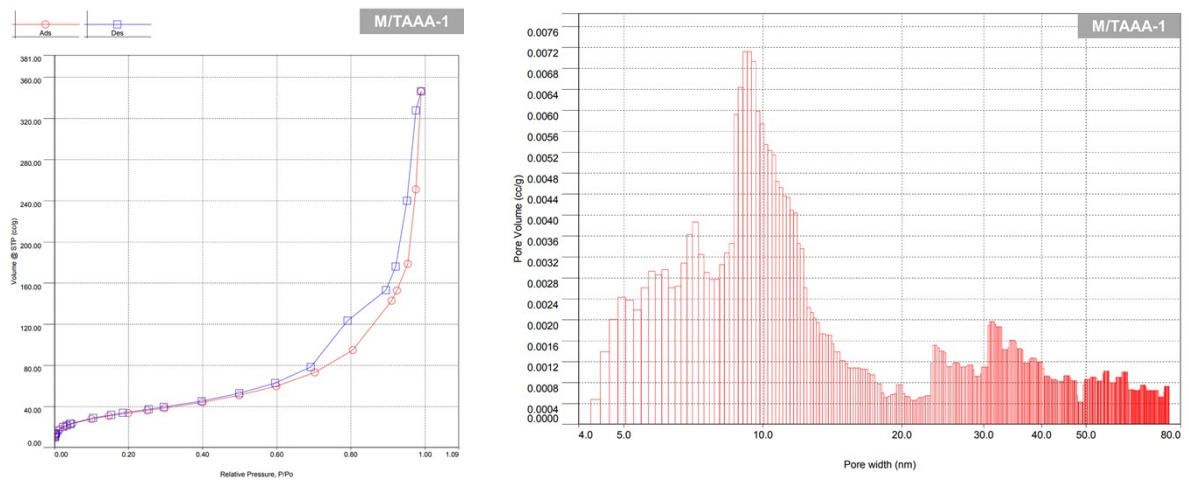

**Fig. S2.** Isotherms of nitrogen adsorption/desorption of samples at low temperature (77 K) and histograms of pore size distribution

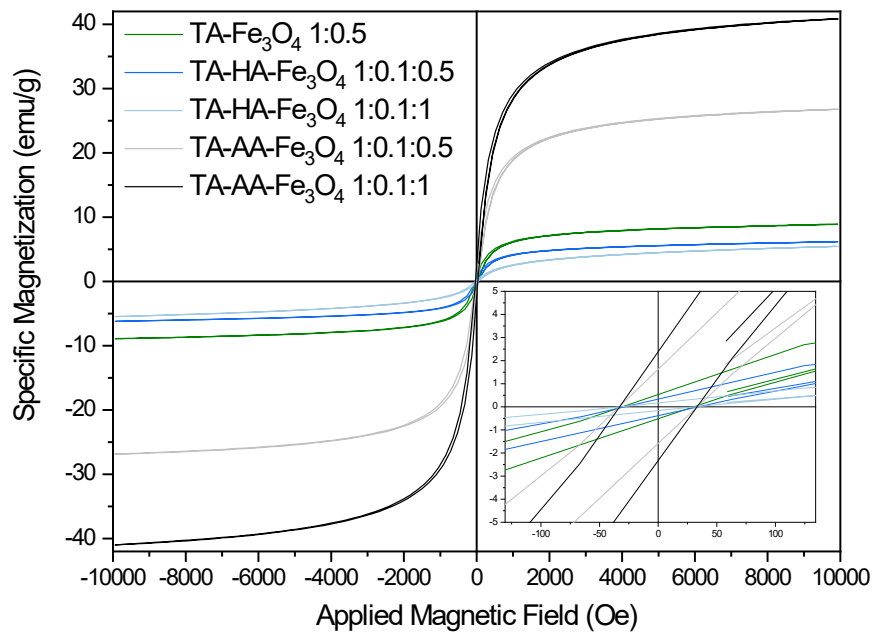

**Fig. S3.** Magnetization curves for the powders of samples at 300 K

**Table S2.** Magnetic properties of obtained nanoparticle NPs.

| Sample                       | $M_s$ (emu/g) | $M_r$ (emu/g) | $H_c$ (Oe) |
|------------------------------|---------------|---------------|------------|
| $Fe_3O_4$                    | 31,5          | 2,0           | 39,5       |
| TA- $Fe_3O_4$ (1:0.5)        | 8,91          | 0,52          | 30,6       |
| TA-HA- $Fe_3O_4$ (1:0.1:0.5) | 6,18          | 0,33          | 29,8       |
| TA-HA- $Fe_3O_4$ (1:0.1:1)   | 5,50          | 1,67          | 31,9       |
| TA-AA- $Fe_3O_4$ (1:0.1:0.5) | 26,8          | 1,61          | 33,4       |
| TA-AA- $Fe_3O_4$ (1:0.1:1)   | 40,8          | 2,36          | 33,2       |
